# Supplementary material
Source: PubMed Central journal article supplement (PMC8355130)
Supplement: NIHMS1724009-supplement-Supplementary_Materials.pdf [file NIHMS1724009-supplement-Supplementary_Materials.pdf]

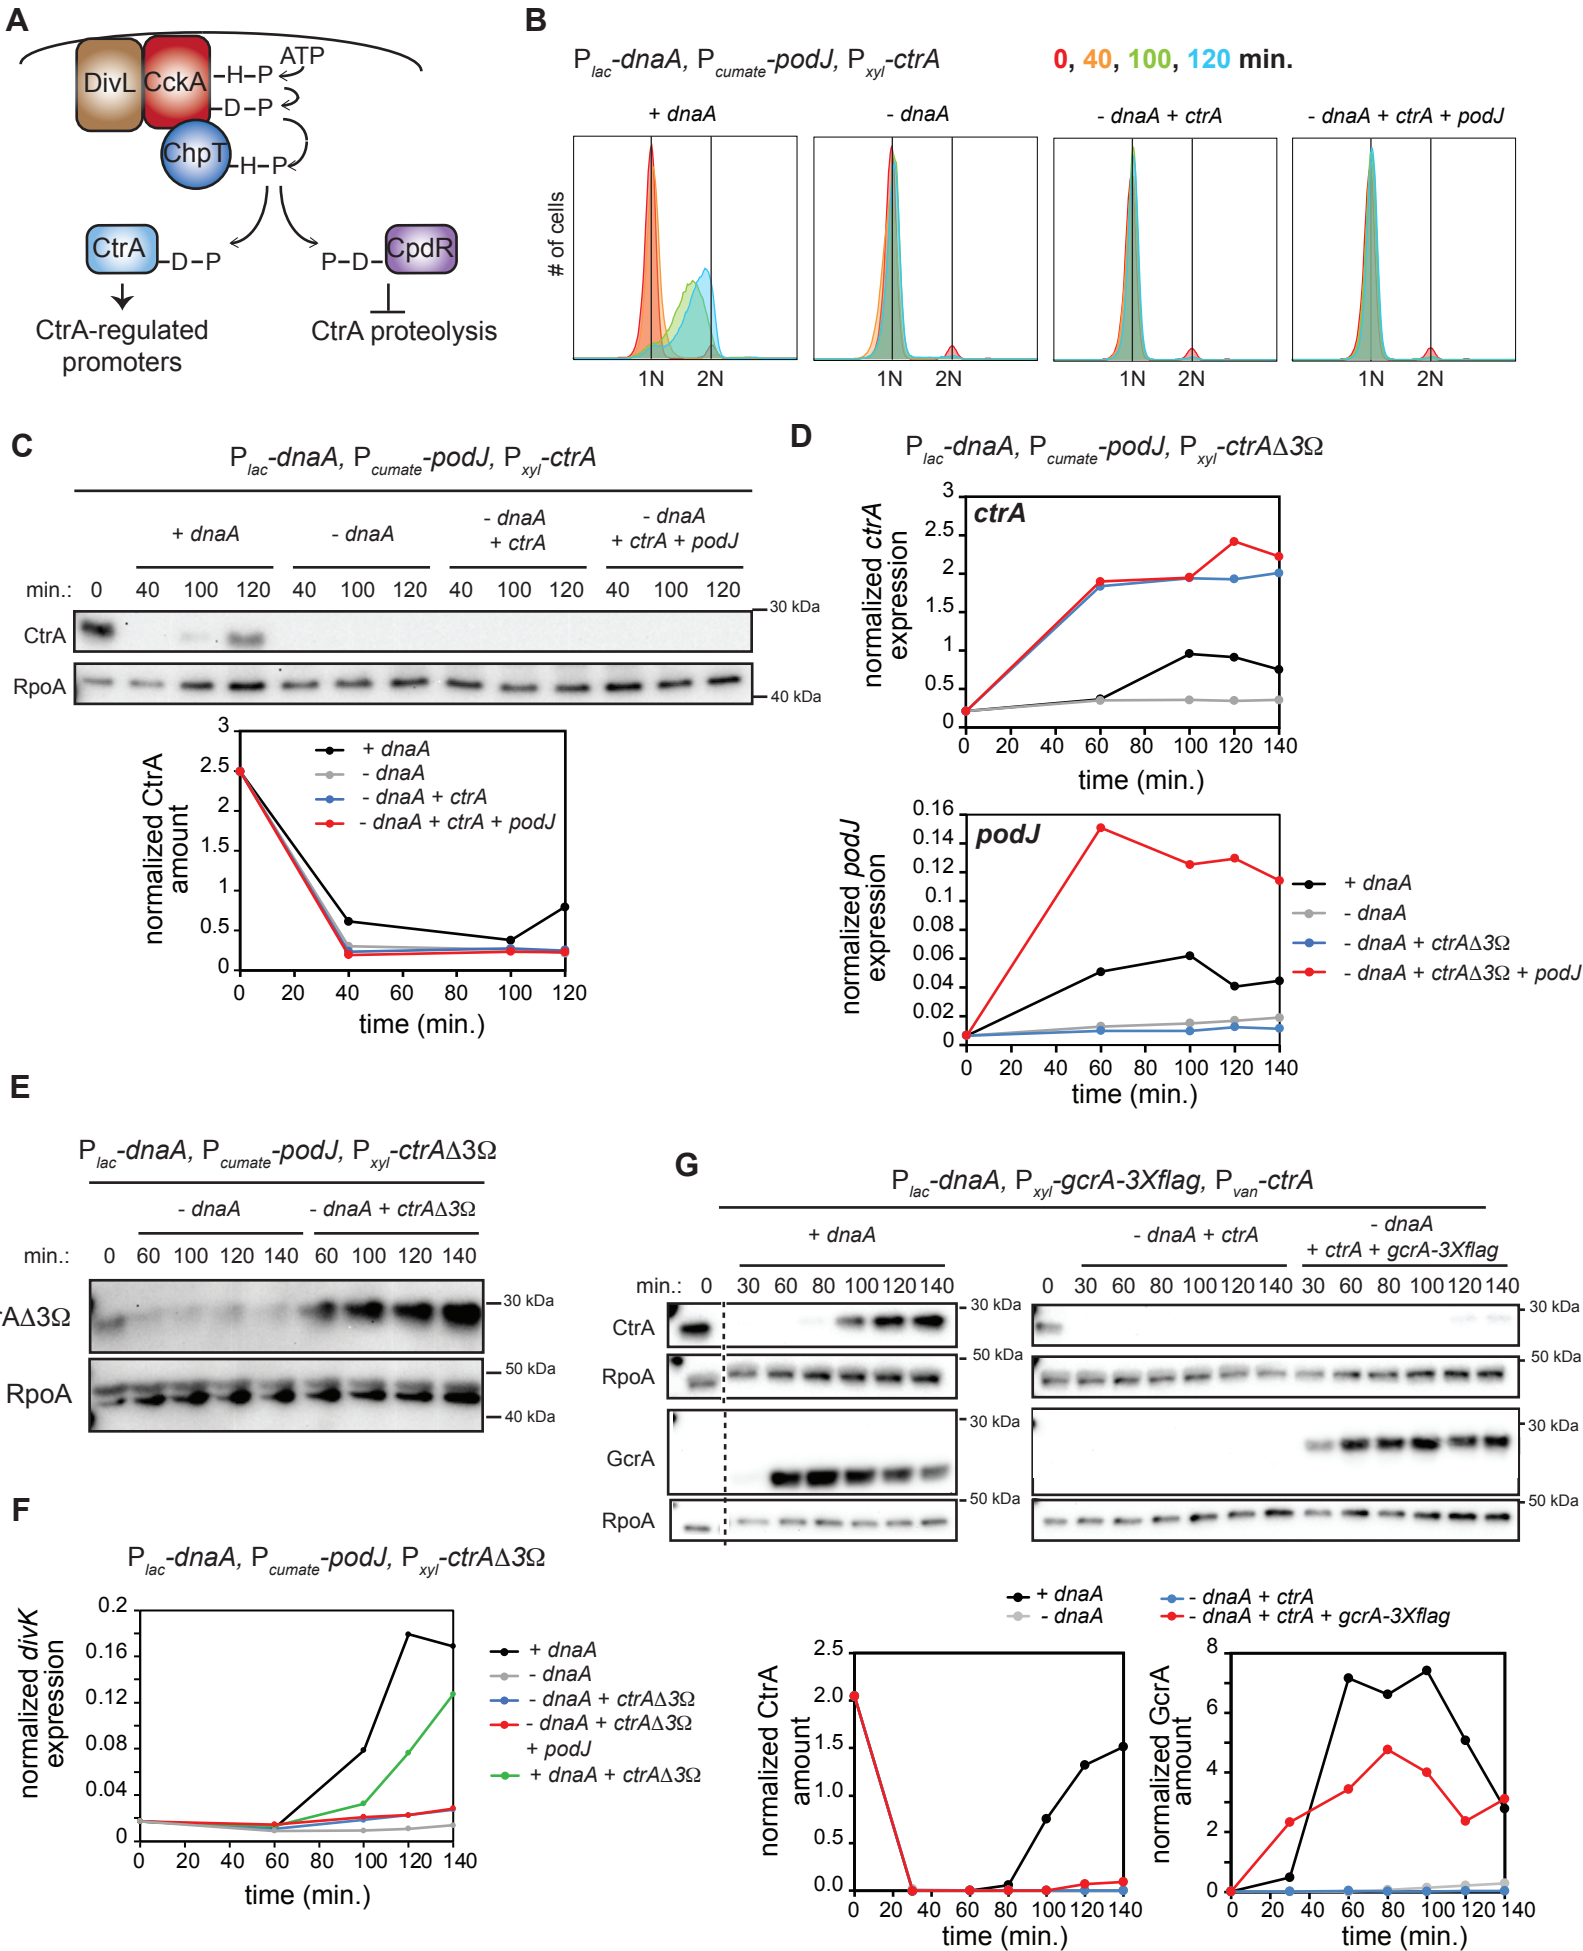

**Figure S1, related to Fig. 1: Polarization of CckA and DivL is not sufficient to activate CtrA in predivisional cells in the absence of DNA replication.**

(A) Schematic of the CckA-ChpT phosphorelay activity at the new pole in predivisional cells.

(B) Flow cytometry profiles after SYTOX staining showing DNA content of synchronized cells expressing *dnaA* (+IPTG) or depleted of *dnaA* (-IPTG) with ectopic expression of *ctrA* (+0.075% xyl) and *podJ* (+cumate) when indicated.

(C) Biological replicate of Fig. 1B.

(D) mRNA levels of the *ctrA* and *podJ* genes measured by qRT-PCR and normalized to *rpoA* mRNA levels in cells expressing *dnaA* (+IPTG) or depleted for *dnaA* (-IPTG) with ectopic expression of the stable *ctrA* point mutant *ctrA $\Delta$ 3 $\Omega$*  (+0.075% xyl) and *podJ* (+cumate) when indicated.

(E) CtrA $\Delta$ 3 $\Omega$  protein levels in cells depleted for *dnaA* (-IPTG) with ectopic expression of the stable *ctrA* point mutant *ctrA $\Delta$ 3 $\Omega$*  (+0.075% xyl) when indicated.

(F) Data represent one of the biological replicates from Fig. 1C with addition of the +*dnaA* +*ctrA $\Delta$ 3 $\Omega$*  condition.

(G) CtrA and GcrA protein levels at the times indicated post-synchronization in cells expressing *dnaA* (+IPTG) or depleted of *dnaA* (-IPTG) with ectopic expression of wild-type *ctrA* (+van) and *gcrA-3xflag* (+xyl) when indicated. Graphs show CtrA and GcrA protein band intensity normalized to RpoA.

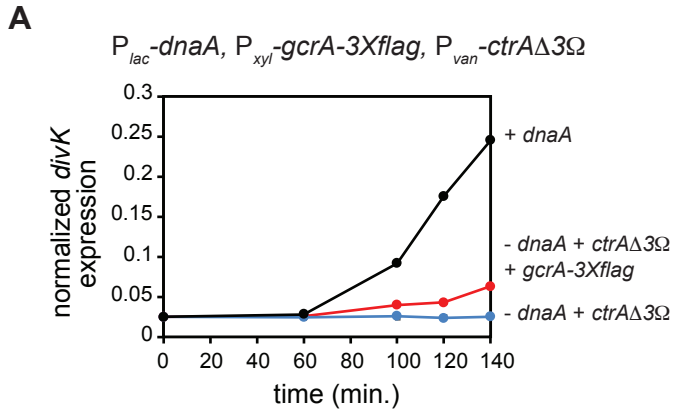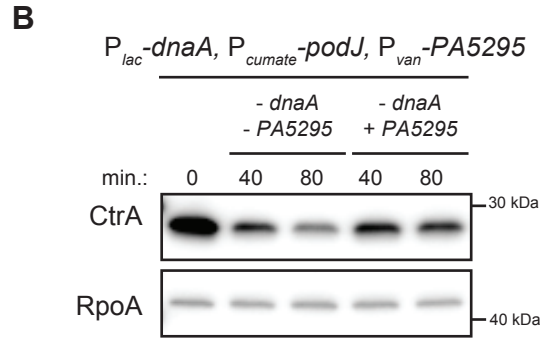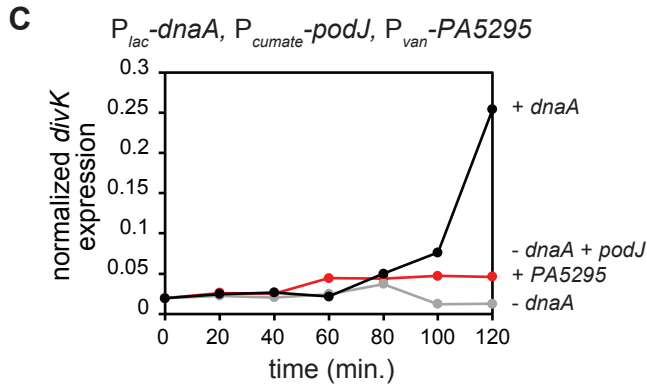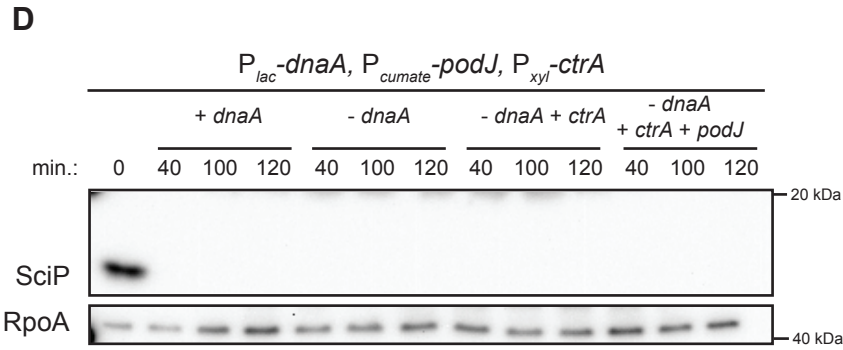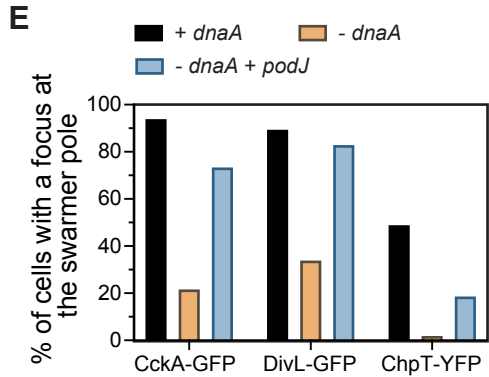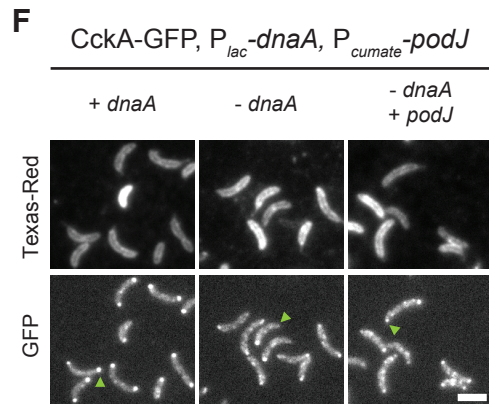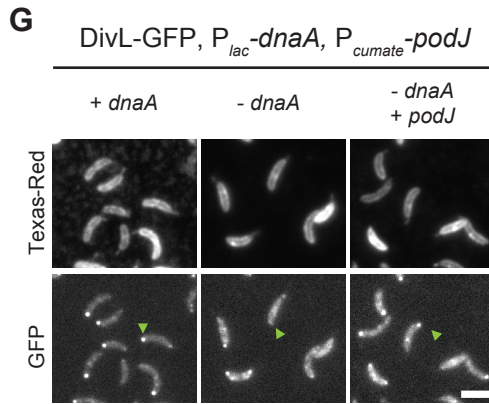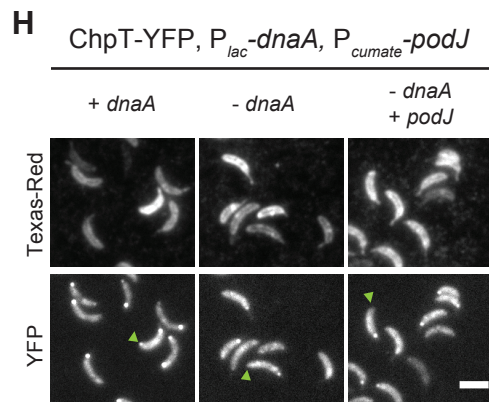

**Figure S2, related to Fig. 1: Polarization of CckA and DivL is not sufficient to activate CtrA in predivisional cells in the absence of DNA replication.**

(A) mRNA levels of the CtrA-activated gene *divK* measured by qRT-PCR and normalized to *rpoA* mRNA levels at the times indicated post-synchronization in cells expressing *dnaA* (+IPTG) or depleted of *dnaA* (-IPTG) with ectopic expression of the proteolytically stable mutant *ctrA* $\Delta$ 13 $\Omega$  (+van) and with (+xyl) or without ectopic expression of *gcrA-3xflag*.

(B) CtrA protein levels in cells expressing (+ 50  $\mu$ M van) or not (-van) the PA5295 phosphodiesterase in cells depleted for *dnaA* (-IPTG).

(C) mRNA levels of the CtrA-activated gene *divK* measured by qRT-PCR and normalized to *rpoA* mRNA levels at the times indicated post-synchronization in cells expressing *dnaA* (+IPTG) or depleted of *dnaA* (-IPTG) and the *P. aeruginosa* phosphodiesterase PA5295 (+50  $\mu$ M van) when indicated. This strain also expressed an ectopic copy of *podJ* (+cumate), when indicated.

(D) SciP protein levels at the times indicated post-synchronization in cells expressing *dnaA* (+IPTG) or depleted of *dnaA* (-IPTG) with ectopic expression of *ctrA* (+xyl) and *podJ* (+cumate) when indicated.

(E-G) Same as Fig. 1D-F but with additional Texas-Red-X succinimidyl ester (TRSE) staining to label the stalk by non-specifically labeling surface-exposed proteins (Hughes *et al.*, 2013). Scale bars = 2  $\mu$ m.

**A**

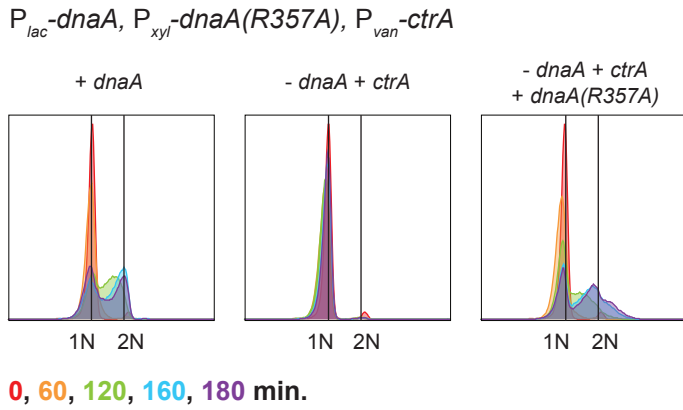

**B**

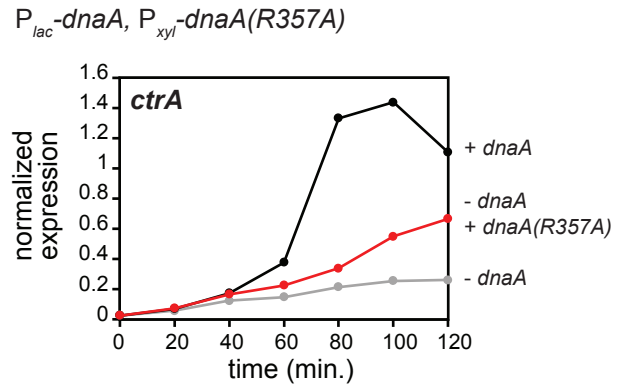

**C**

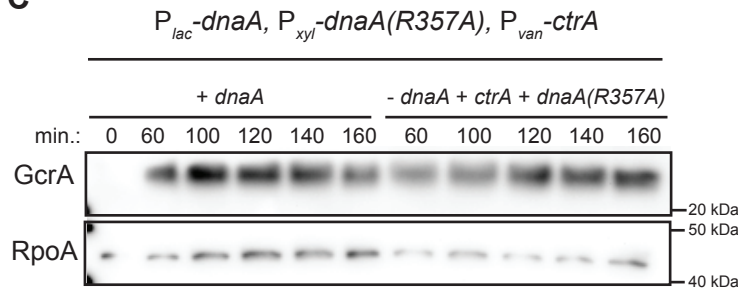

**E**

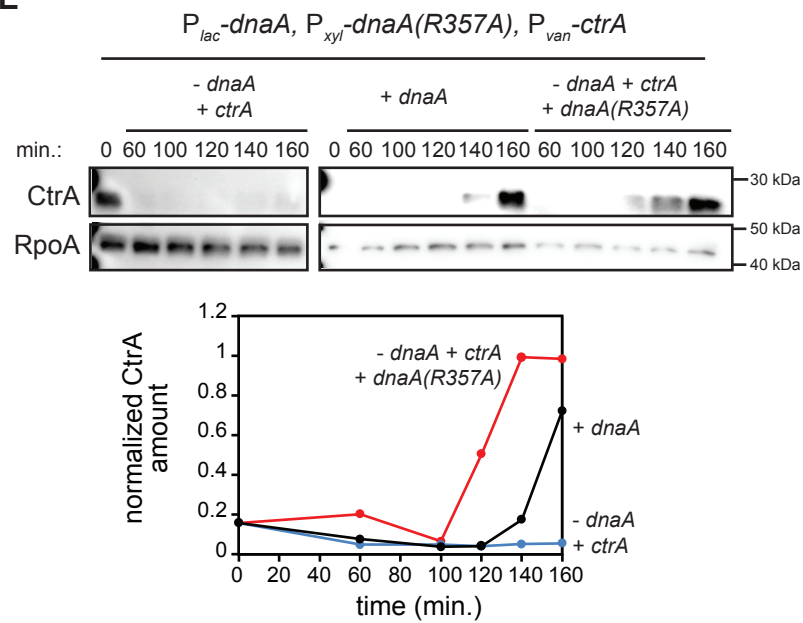

**D**

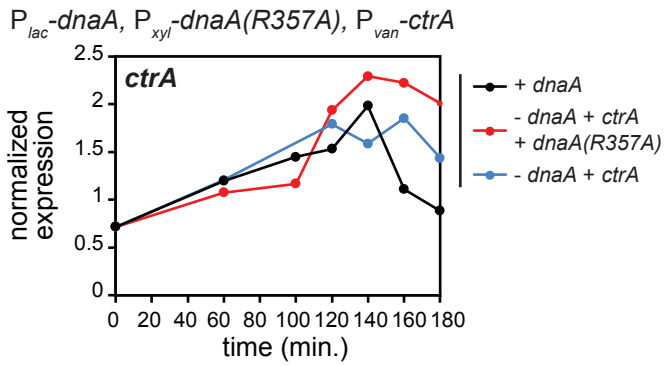

**Figure S3, related to Fig. 2: Replication of the full chromosome is not required for CtrA activation.**

(A) Flow cytometry profiles after SYTOX staining showing DNA content of synchronized cells expressing *dnaA* (+IPTG) or depleted of *dnaA* (-IPTG) with ectopic expression of *ctrA* (+van) and *dnaA(R357A)* (+xyl) when indicated.

(B) *ctrA* mRNA levels measured by qRT-PCR and normalized to *rpoA* mRNA levels in cells expressing *dnaA* (+IPTG) or depleted of *dnaA* (-IPTG) with ectopic expression of *dnaA(R357A)* (+xyl) when indicated.

(C) GcrA protein levels in cells expressing *dnaA* (+IPTG) or depleted of *dnaA* (-IPTG) with ectopic expression of wild-type *ctrA* (+van) and *dnaA(R357A)* (+xyl). RpoA is shown as a loading control.

(D) mRNA levels of *ctrA* measured by qRT-PCR and normalized to *rpoA* mRNA levels in cells expressing *dnaA* (+IPTG) or depleted of *dnaA* (-IPTG) with ectopic expression of *ctrA* (+van) and *dnaA(R357A)* (+xyl) when indicated.

(E) Biological replicate of Fig. 2B.

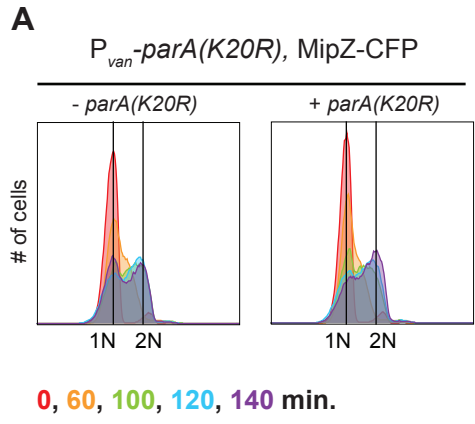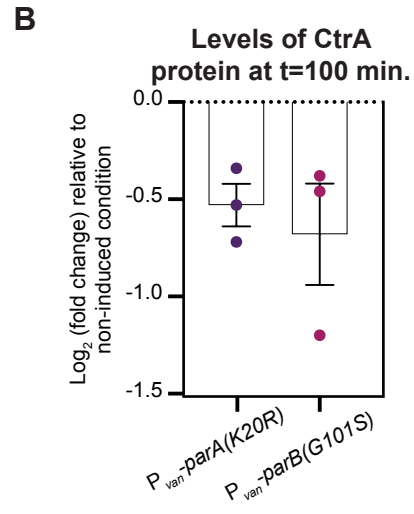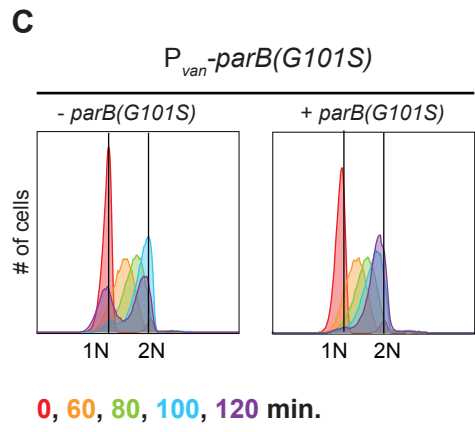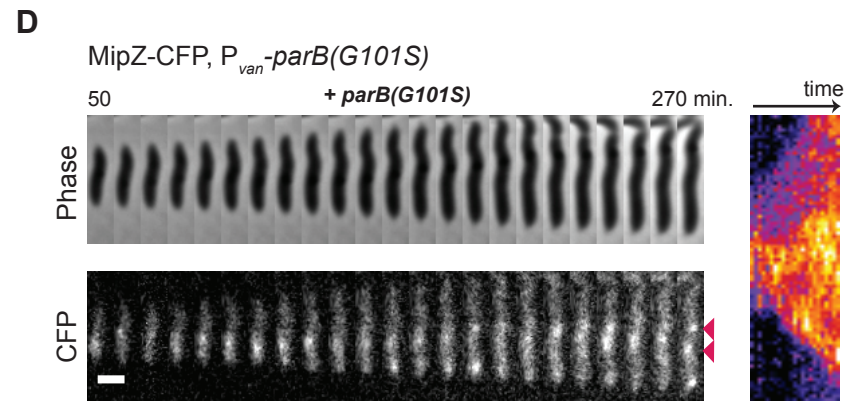

**Figure S4, related to Fig. 3: CtrA activation in predivisional cells is reduced when chromosome segregation is perturbed.**

(A) Flow cytometry profiles after SYTOX staining showing DNA content of synchronized cells with (+van) or without (-van) ectopic expression of *parA(K20R)*. Expression of *parA(K20R)* was induced 60 min. before synchronization and after synchronization with 500  $\mu$ M vanillate.

(B) Relative fold-change in CtrA protein levels normalized to RpoA levels 100 min. post-synchronization, when inducing *parA(K20R)* or *parB(G101S)* 60 min. pre-synchronization compared to the uninduced condition. Bars indicate mean  $\pm$  SEM from three biological replicates shown as individual datapoints.

(C) Flow cytometry profiles after SYTOX staining showing DNA content of synchronized cells with (+van) or without (-van) ectopic expression of *parB(G101S)*. Expression of *parB(G101S)* was induced 60 min. before synchronization and after synchronization with 500  $\mu$ M vanillate.

(C) Time lapse of MipZ-CFP dynamics within a single cell expressing the *parB(G101S)* mutant. *parB(G101S)* was induced 30 min. before synchronization and during imaging post-synchronization in the agarose pad with addition of 500  $\mu$ M vanillate. Red arrows show MipZ-CFP internal clusters next to the newly replicated chromosomal origins. Scale bar = 1  $\mu$ m.



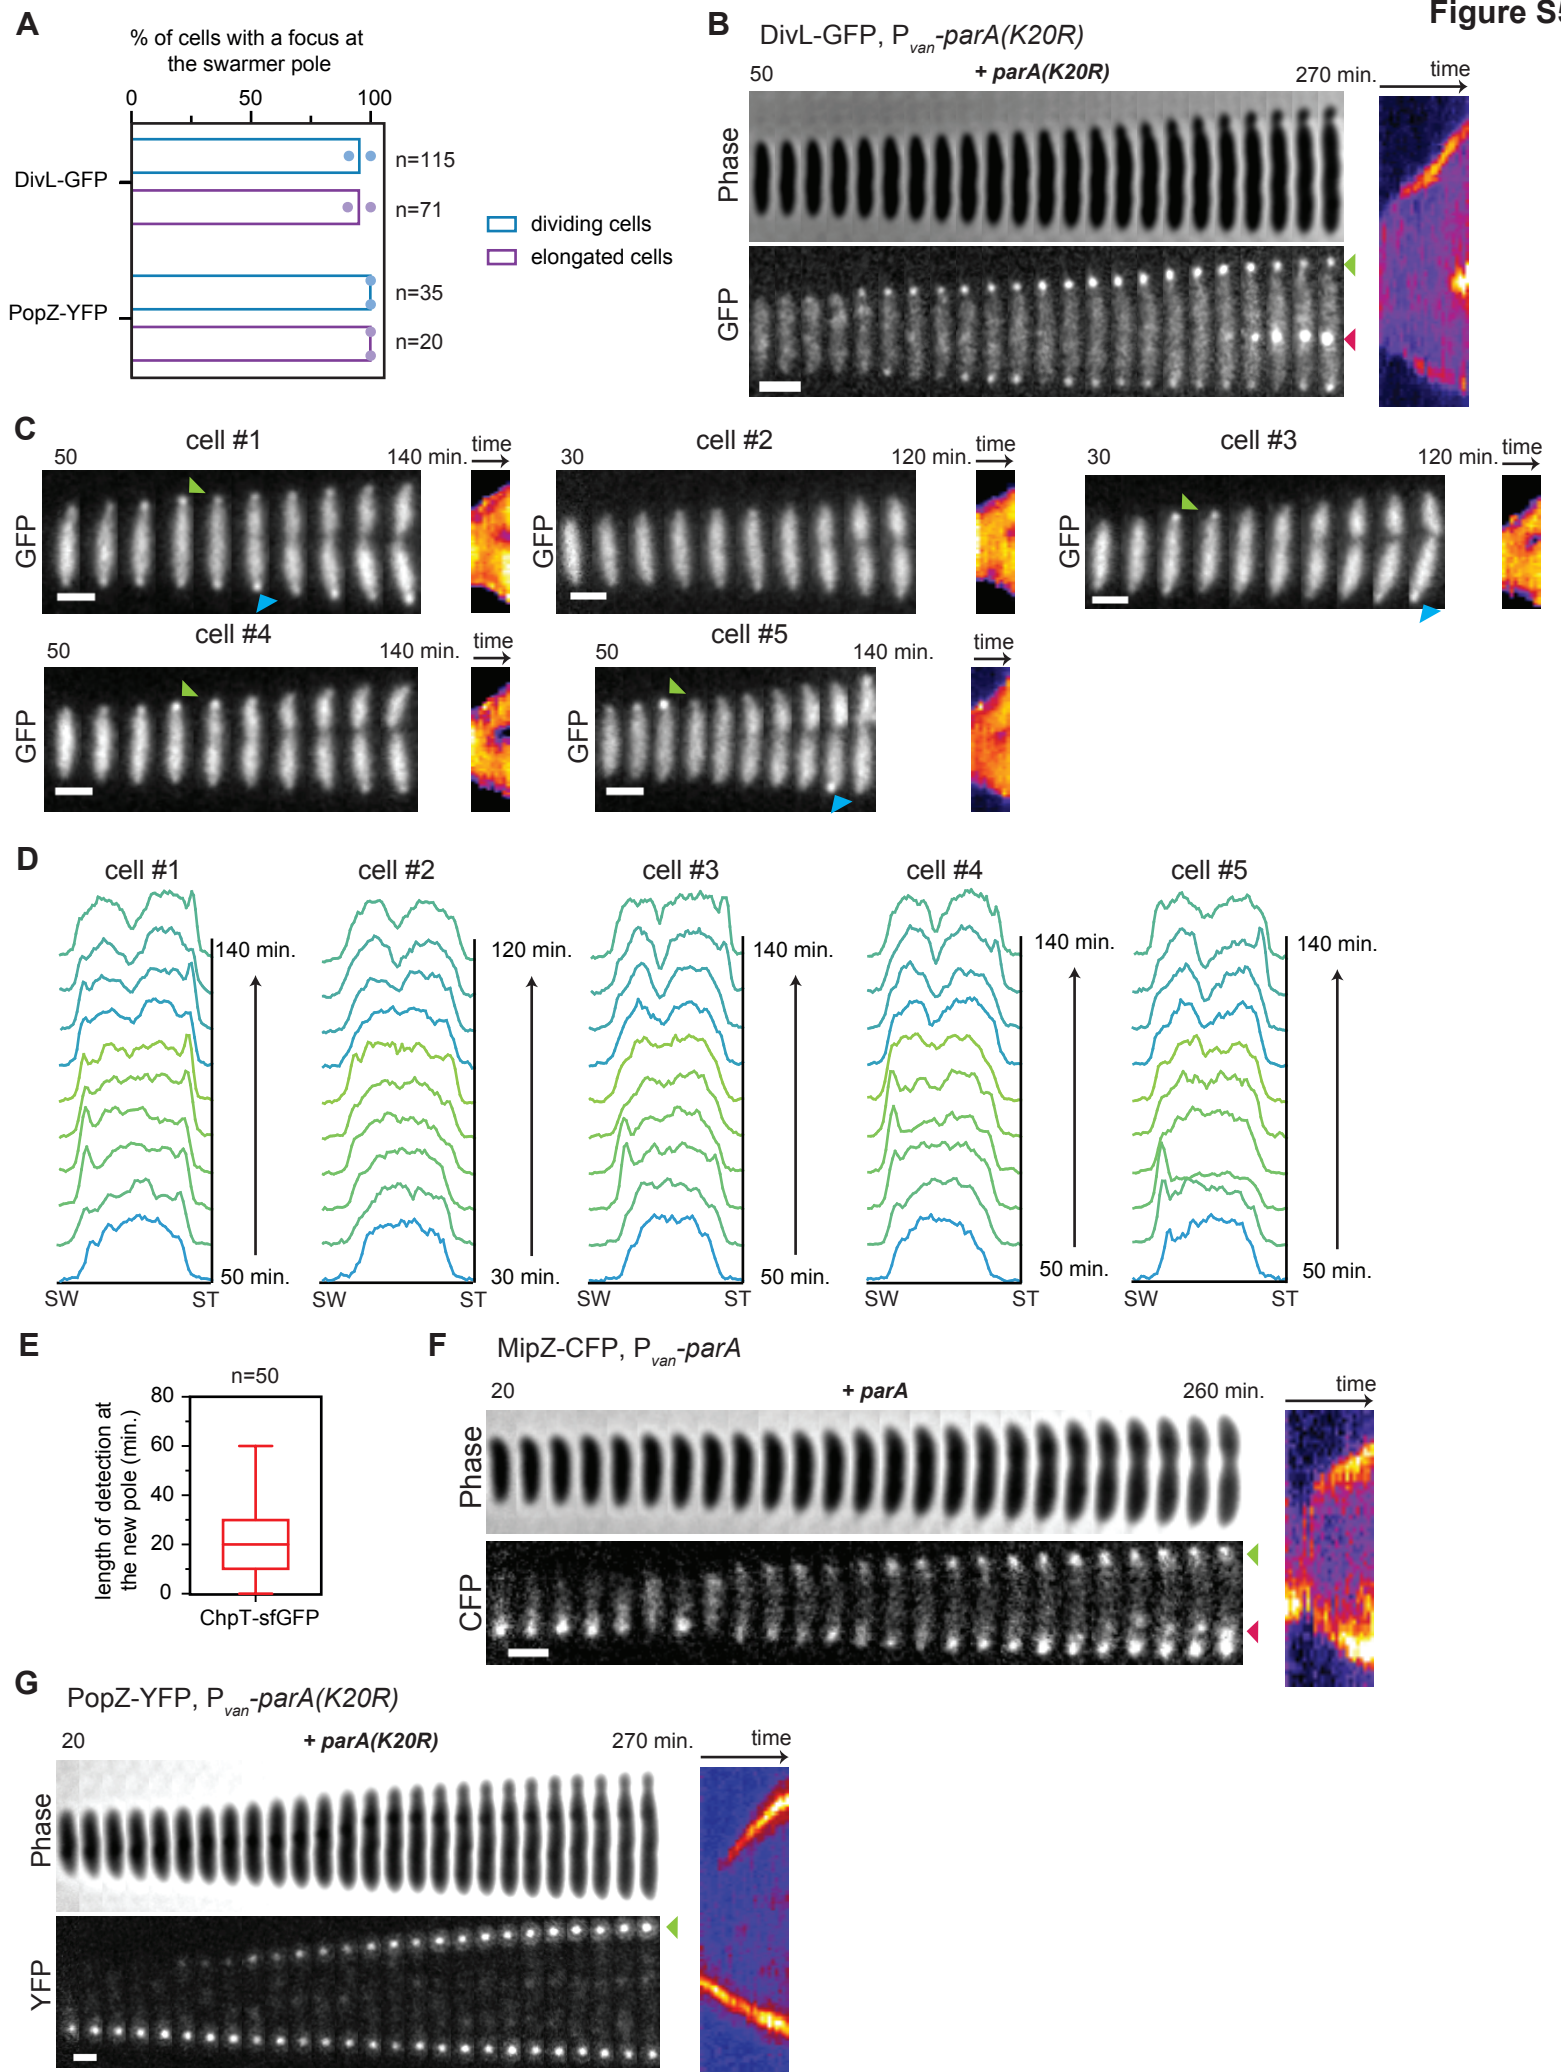

**Figure S5, related to Fig. 4: ChpT access to the new swarmer pole is affected when chromosome segregation is disrupted.**

(A) Percentage of cells with detectable foci at the swarmer pole at any time during time-lapse imaging of DivL-GFP and PopZ-YFP without *parA(K20R)* induction (dividing cells; -van) and with *parA(K20R)* induction (elongated cells only; +van). *parA(K20R)* was induced 30 min. pre- and post-synchronization with 500  $\mu$ M vanillate. Bars indicate mean from two biological replicates shown as individual datapoints. Total # of cells examined from two biological replicates indicated in each case.

(B) Example from time lapse imaging of cells quantified in (A) for DivL-GFP. Green arrow shows DivL-GFP localization at the new swarmer pole. Red arrow shows DivL-GFP accumulation in a single internal cluster. Scale bar = 1  $\mu$ m.

(C) Time-lapses of ChpT-sfGFP in wild-type cells. Additional examples of individual cells from the one shown in Fig. 4A. See also Movie S1. Green arrow shows ChpT-sfGFP localization at the new swarmer pole and blue arrow shows ChpT-sfGFP localization at the old stalked pole. Scale bar = 1  $\mu$ m.

(D) Average fluorescence intensity profiles from the new pole to the old pole of the five individual cells shown in (C).

(E) Boxplot representing the length of detection of ChpT-sfGFP in wild-type cells at the new pole, based on the number of consecutive frame with a detectable ChpT-sfGFP polar cluster. The lower and upper boundaries of the boxes correspond to the 25% and 75% percentiles, respectively. The median is shown as a thick black line and the whiskers represent the minimum and maximum values.

(F) Timelapse of MipZ-CFP dynamics within a single cell expressing ectopic wild-type *parA*, induced 30 min. before synchronization and during imaging post-synchronization in the agarose pad with addition of 500  $\mu$ M vanillate. Green arrow shows MipZ-CFP localization at the new swarmer pole. Red arrow shows MipZ-CFP internal cluster. Scale bar = 1  $\mu$ m.

(G) As in (B) but for PopZ-YFP dynamics. The green arrow shows PopZ-YFP localization at the new swarmer pole. Scale bar = 1  $\mu$ m.

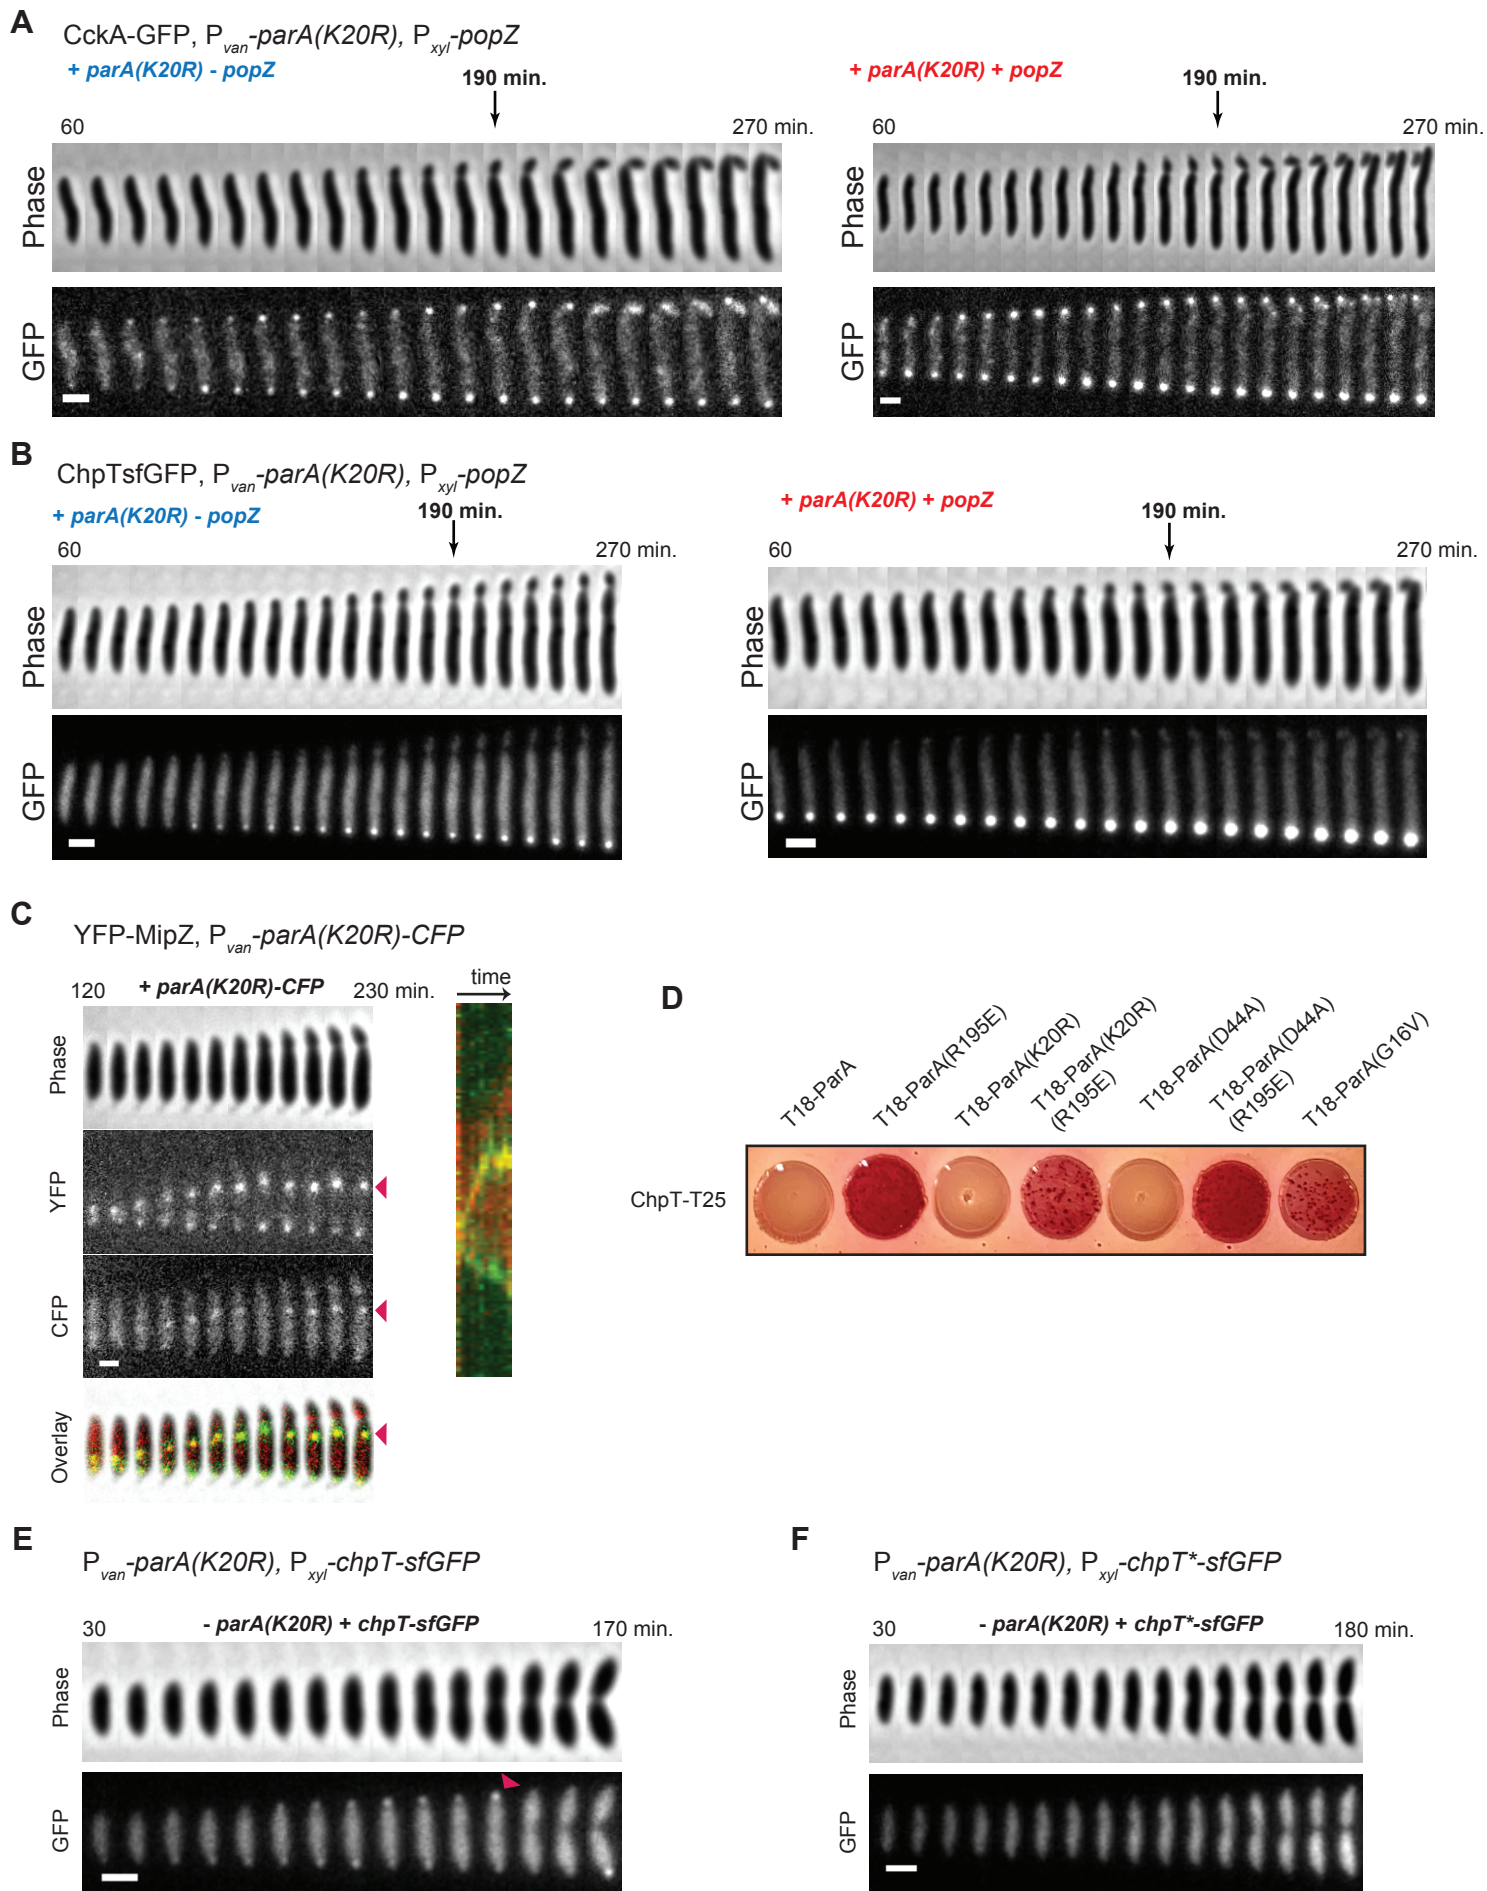

**Figure S6, related to Fig. 5: ParA not bound to DNA recruits ChpT to the swarmer pole**

(A-B) Full time lapses of CckA-GFP (A) and ChpT-sfGFP (B) dynamics in cells expressing *parA(K20R)* (+van) with (+xyl) or without (-xyl) induction of *popZ* expression, corresponding to Fig. 5A and B respectively. Scale bar = 1  $\mu$ m.

(C) YFP-MipZ internal clusters colocalize with ectopically produced ParA(K20R)-CFP. Time lapse imaging of YFP-MipZ and ParA(K20R)-CFP dynamics within a single cell expressing *parA(K20R)* (+van). *parA(K20R)* was induced 30 min. before synchronization and during imaging post-synchronization in the agarose pad with addition of 500  $\mu$ M vanillate. In the overlay, YFP-MipZ is shown in green and ParA(K20R)-CFP in red. Red arrows show the YFP-MipZ and ParA(K20R)-CFP internal cluster. Scale bar = 1  $\mu$ m.

(D) Bacterial two-hybrid assay testing the interaction of ChpT fused to the T25 *Bordetella* adenylate cyclase domain with ParA and ParA point mutants fused to the *Bordetella* T18 adenylate cyclase domain. When spotted on MacConkey agar plates supplemented with IPTG and maltose, interactions between the two fusion proteins result in a red color shift of the bacterial colony.

(E-F) Time lapse of the dynamics of ectopic ChpT-sfGFP and the ChpT(R167E,R169E,R171E)-sfGFP (ChpT\*-sfGFP) mutant (+xyl) in cells that are not expressing *parA(K20R)*. Compare to Fig. 5E and F, respectively. Note that the ChpT\*-sfGFP point mutant fails to accumulate at the new pole prior to cell division, compared to ectopically produced wild-type ChpT-sfGFP (red arrow). Scale bar = 1  $\mu$ m.

**Supplementary Table S1, related to STAR Methods, strain construction: Bacterial strains used in this study**

| <b><i>Caulobacter crescentus</i> strains</b> |                                                                                                                                       |            |
|----------------------------------------------|---------------------------------------------------------------------------------------------------------------------------------------|------------|
| ML1071                                       | ChpT-YFP                                                                                                                              | This study |
| ML3415                                       | eYFP-mipZ::mipZ                                                                                                                       | This study |
| ML3359                                       | <i>hfa</i> ::P <sub>lacI-lacI</sub> P <sub>dnaA</sub> ::P <sub>lac</sub> P <sub>cum-podJ</sub> P <sub>xyI-ctrA</sub>                  | This study |
| ML3360                                       | <i>hfa</i> ::P <sub>lacI-lacI</sub> P <sub>dnaA</sub> ::P <sub>lac</sub> P <sub>cum-podJ</sub> P <sub>xyI-ctrA</sub> Δ3Ω              | This study |
| ML3361                                       | CckA-GFP <i>hfa</i> ::P <sub>lacI-lacI</sub> P <sub>dnaA</sub> ::P <sub>lac</sub> P <sub>cum-podJ</sub>                               | This study |
| ML3362                                       | DivL-GFP <i>hfa</i> ::P <sub>lacI-lacI</sub> P <sub>dnaA</sub> ::P <sub>lac</sub> P <sub>cum-podJ</sub>                               | This study |
| ML3363                                       | ChpT-YFP <i>hfa</i> ::P <sub>lacI-lacI</sub> P <sub>dnaA</sub> ::P <sub>lac</sub> P <sub>cum-podJ</sub>                               | This study |
| ML3364                                       | <i>hfa</i> ::P <sub>lacI-lacI</sub> P <sub>dnaA</sub> ::P <sub>lac</sub> P <sub>xyI-gcrA-3xflag</sub> P <sub>van-ctrA</sub>           | This study |
| ML3365                                       | <i>hfa</i> ::P <sub>lacI-lacI</sub> P <sub>dnaA</sub> ::P <sub>lac</sub> P <sub>xyI-gcrA-3xflag</sub> P <sub>van-ctrA</sub> Δ3Ω       | This study |
| ML3366                                       | <i>cckA</i> (Y514D) P <sub>van-hdaA</sub>                                                                                             | This study |
| ML3367                                       | <i>hfa</i> ::P <sub>lacI-lacI</sub> P <sub>dnaA</sub> ::P <sub>lac</sub> P <sub>cum-podJ</sub> P <sub>van-PA5295</sub>                | This study |
| ML3368                                       | DivL-GFP <i>hfa</i> ::P <sub>lacI-lacI</sub> P <sub>dnaA</sub> ::P <sub>lac</sub> P <sub>xyI-dnaA</sub> (R357A)                       | This study |
| ML3369                                       | DivL-GFP <i>hfa</i> ::P <sub>lacI-lacI</sub> P <sub>dnaA</sub> ::P <sub>lac</sub> P <sub>xyI-dnaA</sub> (R357A) P <sub>van-ctrA</sub> | This study |
| ML3370                                       | MipZ-CFP P <sub>van-parA</sub> (K20R)                                                                                                 | This study |
| ML3371                                       | CckA-GFP P <sub>van-parA</sub> (K20R)                                                                                                 | This study |
| ML3372                                       | DivL-GFP P <sub>van-parA</sub> (K20R)                                                                                                 | This study |
| ML3373                                       | ChpT-sfGFP                                                                                                                            | This study |
| ML3374                                       | ChpT-sfGFP P <sub>van-parA</sub> (K20R)                                                                                               | This study |
| ML3375                                       | ChpT-sfGFP P <sub>van-parA</sub>                                                                                                      | This study |
| ML3376                                       | MipZ-CFP P <sub>van-parA</sub>                                                                                                        | This study |
| ML3377                                       | YFP-MipZ P <sub>van-parA</sub> (K20R)- <i>cfp</i>                                                                                     | This study |
| ML3378                                       | ChpT-YFP P <sub>van-parA</sub> (K20R)- <i>cfp</i>                                                                                     | This study |
| ML3379                                       | PopZ-YFP P <sub>van-parA</sub> (K20R)                                                                                                 | This study |
| ML3380                                       | ChpT-sfGFP P <sub>van-parA</sub> (K20R) P <sub>xyI-popZ</sub>                                                                         | This study |
| ML3381                                       | CckA-GFP P <sub>van-parA</sub> (K20R) P <sub>xyI-popZ</sub>                                                                           | This study |
| ML3382                                       | <i>xyI</i> ::P <sub>xyI-chpT-sfgfp</sub> P <sub>van-parA</sub> (K20R)                                                                 | This study |
| ML3383                                       | <i>xyI</i> ::P <sub>xyI-chpT</sub> (R167E)(R169E)(R171E)- <i>sfgfp</i> P <sub>van-parA</sub> (K20R)                                   | This study |
| ML3384                                       | MipZ-CFP <i>van</i> ::P <sub>van-1Xflag-parB</sub> (G101S)                                                                            | This study |
|                                              |                                                                                                                                       |            |
| <b><i>E. coli</i> strains</b>                |                                                                                                                                       |            |
| ML3385                                       | BTH101 pKNT25-ChpT                                                                                                                    | This study |
| ML3386                                       | BTH101 pKNT25-ChpT <sub>DHP</sub>                                                                                                     | This study |

|        |                                                    |            |
|--------|----------------------------------------------------|------------|
| ML3387 | BTH101 <i>pKT25-CckA<sub>HK</sub></i>              | This study |
| ML3388 | BTH101 <i>pKNT25-ChpT(R167E)(R169E)(R171E)-T25</i> | This study |
| ML3389 | BTH101 <i>pUT18C-ParB</i>                          | This study |
| ML3390 | BTH101 <i>pUT18C-ParA</i>                          | This study |
| ML3391 | BTH101 <i>pUT18C-ParA(R195E)</i>                   | This study |
| ML3392 | BTH101 <i>pUT18C-ParA(K20R)</i>                    | This study |
| ML3393 | BTH101 <i>pUT18C-ParA(K20R)(R195E)</i>             | This study |
| ML3394 | BTH101 <i>pUT18C-ParA(D44A)</i>                    | This study |
| ML3395 | BTH101 <i>pUT18C-ParA(D44A)(R195E)</i>             | This study |
| ML3396 | BTH101 <i>pUT18C-ParA(G16V)</i>                    | This study |
| ML3397 | BTH101 <i>pUT18-ChpT</i>                           | This study |
| ML3398 | BTH101 <i>pUT18C-CckA<sub>RD</sub></i>             | This study |
| ML3399 | BTH101 <i>pUT18C-MipZ</i>                          | This study |
| ML3400 | BTH101 <i>pUT18C-MipZ(R194A)</i>                   | This study |

**Supplementary Table S2, related to STAR Methods, plasmid construction and quantitative PCR: Primers used in this study**

| <b>Primers</b>                                                                   |                       |
|----------------------------------------------------------------------------------|-----------------------|
| AAGCTTTTCGCGAGACGTCCAATTGCATATGACCGAGACCGTCACCGAGACCACCGCCCC                     | pYFPC2_chpT_up_F      |
| GGGGGCGGTGGTCTCGGTGACGGTCTCGGTCATATGCAATTGGACGTCTCGCGAAAGCTT                     | pYFPC2_chpT_up_R      |
| GACCCCGTGAAGAGCTCCTCGCCCTTCGACATGGTGGCGCCCGAGCCCCGCGCCGGGACCCAGGCGGCGATCGAGGCGCG | chpT_down_sfGFP_up_R  |
| ACGCATGGCATGGATGAACTCTACAAGTAAGCTAGCTGCAGCCCGGGGGATCCACTAGTT                     | sfGFP_down_pYFPC2_F   |
| cagacgctcagagttttggggagacgacatATGACCGAGACCGTCACCGAGACCACCGCC                     | pBX_chpT_up_F         |
| AACTAGTGGATCCCCGGGCTGCAGCTAGCTTACTTGTAGAGTTCATCCATGCCATGCGT                      | sfGFP_pXGFPC_down_R2  |
| ACGCATGGCATGGATGAACTCTACAAGTAAGCTAGCTGCAGCCCGGGGGATCCACTAGTT                     | sfGFP_pXGFPC_down_F2  |
| GGCGGTGGTCTCGGTGACGGTCTCGGTCATatggtcgtctcccaaaactcagcgtctg                       | pBX_chpT_up_R         |
| CTGTTTGTAAGTAGAGGAAGCTTCCGCATGACGGCGGCTTCGCCATGGAGCC                             | podJ_4pQF_1..24       |
| GAGCTCGGTACCTCGAGATCTTCTAGAGTcttattaTTAGCGCGGTAGACCGACAGGCG                      | podJ_4pQF_last24      |
| CATGCGGAAGCTTCCTCTACTAGT                                                         | pQF_CPEC_up           |
| GACTCTAGAAGATCTCGAGGTACCG                                                        | pQF_CPEC_noFLAG_down  |
| GGAATTCCATATGCGCGTACTGTTGATCGA                                                   | ctrA_NdeI_F           |
| CTAGCTAGCTCATCAGGCGGCGTTAACCTGCT                                                 | ctrA-extrastop-NheI-R |
| tgtatcGCTAGCtcatcaatcaatcaccggatccc                                              | ctrAΔ3W -NheI-R       |
| GACGCTGTCGGTGAAACGGTC                                                            | dnaA 1068..1048       |
| gcCGAGCTGGAAGGCGCGCTGAAACACC                                                     | dnaA 1069..1095 R357A |
| CGGgaattcTTATTATTAGCCCCGCAGCTTGCGCG                                              | DnaA_rev_3xTAA_EcoRI  |
| AGATCATATGACCATGAAGGGCGGGTTC                                                     | NdeI_DnaA_1..23       |
| GGAGACGACCATATGGTGTCCGCTAAT                                                      | pXYFP_ParA_NdeI_up_F  |
| CGAGCTCTTATTAGGCGGCCTTGCCCTGGCG                                                  | ParA_TAATAA_SacI_R    |
| GCCGAACCACGATGCGAGGAAACGCATATGGTGTCCGCTAATCCTCTCCGCGTCTGGCT                      | pRVMCS-6_parA_up_F    |
| GCACCGGTACGTAGATCTTAAGAGCTCTTATTAGGCGGCCTTGCCCTGGCGATCGCGTTC                     | pRVMCS-6_parA_down_R  |
| GAACGCGATCGCCAGGCCAAGGCCGCTAATAAGAGCTCTTAAGATCTACGTACCGGTGC                      | pRVMCS-6_parA_down_F  |
| GGTGCCCTTAAACGCCTGGTTCTACGCCTG                                                   | pRVMCS6_upcat_R       |
| AGCCAGAACGCGGAGAGGATTAGCGGACACCATATGCGTTTCTCGCATCGTGTTCGGC                       | pRVMCS6_parA_up_R     |
| CCCCTTTTCGCCAGCAGATCCGTCGGTCCCT                                                  | pRMCS_mid_F           |
| accatgcatattaattaaggcgctcagggGCGGCCTTGCCCTGGCGATCGCGTTCGCG                       | parA_CFP_R            |
| CGCGAACGCGATCGCCAGGCCAAGGCCCGCCcctgcagcgccttaattaatgcatggt                       | parA_CFP_F            |
| CTCTAGAACTAGTGGATCCCCGGGCTGCAGCTAGCTtacttgtagcagcgtccatgcc                       | CFP_pRVMCS6_down_R    |
| ggcatggacgagctgtacaagtaaGCTAGCTGCAGCCCGGGGGATCCACTAGTTCTAGAG                     | CFP_pRVMCS6_down_F    |
| cagacgctcagagttttggggagacgacatATGTCCGATCAGTCTCAAGAACCTACAATG                     | pBX_popZ_up_F         |
| actagtgatccccgggctgcaggaattcTTAGGCGCCGCTCCCCGAGAGATACGCTG                        | pB_popZ_down_R        |
| CAGCGTATCTCTCGGGGACGCGGCGCCTAAgaattcctgcagccccggggatccactagt                     | pB_popZ_down_F        |

|                                                                                                        |                          |
|--------------------------------------------------------------------------------------------------------|--------------------------|
| CATTGTAGGTTCTTGAGACTGATCGGACATatggtcgtctcccaaaactcgagcgtctg                                            | pBX_popZ_up_R            |
| acaattcacacaggaacagctATGACCGAGACCGTCACCGAGACCACCG                                                      | pKNT25_chpT_up_F         |
| CGGTGGTCTCGGTGACGGTCTCGGTCATagctgttctctgtgaaattgt                                                      | pKNT25_chpT_up_R         |
| CTCGATCGCCGCCTGGGTCCCGGCGTCAATTCAATGACCATGCAGCAAT                                                      | pKNT25_chpT_down_F       |
| ATTGCTGCATGGTCATTGAATTCGACGCCGGGACCCAGGCGGCGATCGAG                                                     | pKNT25_chpT_down_R       |
| CCGAGTGGCCTTCGGCGCCTCGGCCTCGAATTCAATGACCATGCAGCAAT                                                     | pKNT25_chpTDHP_down_F    |
| ATTGCTGCATGGTCATTGAATTCGAGGCCGAGGCGCCGAAGGCCACTCGG                                                     | pKNT25_chpTDHP_down_R    |
| GGGATCCTCTAGAGTCGACCCTGCAGCCCC                                                                         | pKT25_up_R               |
| TAActaagaattcgccgctgtttacaac                                                                           | pKT25_down_F             |
| CGGGCTGCAGGGTCGACTCTAGAGGATCCCCGCGGCTCAGCGCTTCCGGCG<br>GCGACGCC                                        | pKT25_cckA_HK_up_F       |
| gttgtaaacgacggccgaattcttagTTAGGCGCCGACAGGTCGCGAGCGGCGCGCGG                                             | pKT25_cckA_HK_down_R     |
| CTAAGGGCGAGCCGCTGGCCGAGGGCCT                                                                           | R167E169E171E_short2_F   |
| TTGGCGTCGGCGATGATCGAGAAGCGCCCC                                                                         | R167E169E171E_short2_R   |
| CGGGCGCTTCTCGATCATCGCCGACGCCAAGGGCCGGAGGCGGAGCTGGAG<br>CCGGAGGTGCTGGCGGGCCTAAAGGGCGAGCCGCTGGCCGAGGGCCT | R167E169E171E_ultramer   |
| AGGCCCTCGGCCAGCGGCTCGCCCTTAGGCCCGCCAGCACCTCCGGCTCCA<br>GCTCCGCCTCCGGGCCCTTGCGTCTGGCGATGATCGAGAAGCGCCCC | R167E169E171E_ultramer_R |
| CTGCAGGTCGACTCTAGAGGATCCCGAGTCCGTCGTGGTGGGAGAGCCCCG                                                    | pUT18C_parB_up_F         |
| CGGGCTCTCCCACCACGACGGACTCGGGATCCTCTAGAGTCGACCTGCAG                                                     | pUT18C_parB_up_R         |
| CAACCGACTGACGCGCGGGATCTAACTAAGTAAatggtgcactctcagt                                                      | pUT18C_parB_down_F       |
| actgagagtgcaccataTACTTAGTTAGATCCCGCGGTCAGTCGGTTG                                                       | pUT18C_parB_down_R       |
| CTGCAGGTCGACTCTAGAGGATCCCTCCGCTAATCCTCTCCGCTTCTGG                                                      | pUT18C_parA_up_F         |
| CCAGAACGCGGAGAGGATTAGCGGAGGGATCCTCTAGAGTCGACCTGCAG                                                     | pUT18C_parA_up_R         |
| ACGCGATCGCCAGGCCAAGGCCGCTAACTAAGTAAatggtgcactctc                                                       | pUT18C_parA_down_F       |
| gagagtgcaccataTACTTAGTTAGGCGGCCCTTGCCCTGGCGATCGCGT                                                     | pUT18C_parA_down_R       |
| TCGTACATGGTCAGCACAAACCCCTTGATC                                                                         | ParAR195E_R              |
| CAGCTTGTGGAACAGGTCGCCAAGGACGT                                                                          | ParAR195E_F              |
| GATCCAAGGGGTTGTGCTGACCATGTACGACCGCGAGAACAGCTTGTGCGGAAC<br>AGGTCGCCAAGGACGT                             | ultramer_parAR195E_F     |
| ACGTCCTTGGCGACTGTTCCGACAAGCTGTTCTCGCGGTCGTACATGGTCAG<br>CACAAACCCCTTGATC                               | ultramer_parAR195E_R     |
| AGGGCAACTGTTCCACGGGGCTTGGCATTG                                                                         | ParAD44A_F               |
| TCGATCAGCAGCACGCGCTCGCCGACGGCG                                                                         | ParAD44A_R               |
| CGCCTGCGGGCAGCGCGTGCTGCTGATCGACGCCGCCCGCAGGGCAACTGT<br>TCCACGGGGCTTGGCATTG                             | ParAD44A_ultramer_F      |
| CAATGCCAAGCCCCGTGGAACAGTTGCCCTGCGGGGCGGCGTCGATCAGCAG<br>CACGCGCTCGCCGACGGCG                            | ParAD44A_ultramer_R      |
| TGGGGAAGACCACGACCGGATCAATCTGG                                                                          | ParAG16V_F               |
| GATTGGCGATAGCCAGAACGCGGAGAGGAT                                                                         | ParAG16V_R               |
| ATCCTCTCCGCTTCTGGCTATCGCCAATCAAAGGTCGGGGTGGGGAAGACC<br>ACGACCGGATCAATCTGG                              | ParAG16V_ultramer_F      |
| CCAGATTGATCGCGGTCGTGGTCTTCCCCACCCGACCTTTTGATTGGCGATAG<br>CCAGAACGCGGAGAGGAT                            | ParAG16V_ultramer_R      |
| IATGACCATGATTACGCCAAGCTTGACCGAGACCGTCACCGAGACCACCG                                                     | pUT18_chpT_up_F          |
| CGGTGGTCTCGGTGACGGTCTCGGTCAAGCTTGGCGTAATCATGGTCATa                                                     | pUT18_chpT_up_R          |
| CTCGATCGCCGCCTGGGTCCCGGCGTCAATTGACCGCCAGCGAGGCCA                                                       | pUT18_chpT_down_F        |
| TGGCCTCGCTGGCGGCTGAATTCGACGCCGGGACCCAGGCGGCGATCGAG                                                     | pUT18_chpT_down_R        |



|                                                                                   |                       |
|-----------------------------------------------------------------------------------|-----------------------|
| CTGCAGGTCGACTCTAGAGGATCCCCGCATCCTGTTTCGTCGAGGACGAGG                               | pUT18C_cckA_RD_up_F   |
| CCTCGTCCTCGACGAACAGGATGCGGGGATCCTCTAGAGTCGACCTGCAG                                | pUT18C_cckA_RD_up_R   |
| CAAGCAGCAGCTGCAGGCGGCGTAACTAAGTAAataggtgcactctcagt                                | pUT18C_cckA_RD_down_F |
| actgagagtgcaccataT TACTTAGTTACGCCGCTGCAGCTGCTGCTTG                                | pUT18C_cckA_RD_down_R |
| CTGCAGGTCGACTCTAGAGGATCCCGCCGAAACGCGCGTTATCGTCGTCG                                | pUT18C_mipZ_up_F      |
| CGACGACGATAACGCGCGTTTTCGGCGGGATCCTCTAGAGTCGACCTGCAG                               | pUT18C_mipZ_up_R      |
| CGAGACGATGCTGGCGGCGCAGTAACTAAGTAAataggtgcactctcagt                                | pUT18C_mipZ_down_F    |
| actgagagtgcaccataT TACTTAGTTACTGCGCCGCCAGCATCGTCTCG                               | pUT18C_mipZ_down_R    |
| AAGCGTCTGGAGGACCGCCTCAACGCTTTG                                                    | mipZR194A_F           |
| TGGTGGCCAGGCGGTTGCGCAGCACCACCC                                                    | mipZR194A_R           |
| GGGTGGTGCTGCGCAACCGCCTGGCCACCACCGAGGCGGCCAACCGCAAGCG<br>TCTGGAGACCGCCTCAACGCTTTG  | ultramer_mipZR194A_F  |
| CAAAGCGTTGAGGCGGTCCTCCAGACGCTTGCGGTTGGCCGCCTCGGTGGTG<br>GCCAGGCGGTTGCGCAGCACCACCC | ultramer_mipZR194A_R  |
| GAGCAATGCGACCGTTGATC                                                              | Cori_2_F              |
| CGGTTGCTTAACCACTTGCC                                                              | Cori_2_R              |
| GGGCATGTCGTTGTAGTGGA                                                              | CCNA_03518_F          |
| AACAAGAAGGCGAATCCGGT                                                              | CCNA_03518_R          |
| GACGACGGAATGCTCGAGAT                                                              | CCNA_00623_F          |
| GTGTCATCCACCTGCGAGAA                                                              | CCNA_00623_R          |
| CGGCCATAGATGTCTGAAGCT                                                             | CCNA_02846_F          |
| TCGCAATCTGAACGACACCA                                                              | CCNA_02846_R          |
| ATGGGCTTTGAGACCTCTGC                                                              | CCNA_02189_F          |
| CGAAGCGCCTCATAGATCGT                                                              | CCNA_02189_R          |
| ACTATCGCAGCGTCTTCTCG                                                              | CCNA_02567_F          |
| GTCCATCATTTGCGCTTCGC                                                              | CCNA_02567_R          |
| TTCGTCTGGTTCTGGCTGTC                                                              | CCNA_01869_F          |
| CGTCAGCGTCTACGACTACC                                                              | CCNA_01869_R          |
| ACATCGTCTACATCGGCGAC                                                              | rpoA_qPCR_1           |
| GGCGAGCACTTCCTTGATCT                                                              | rpoA_qPCR_2           |
| GTACGACCCTGACCAAGGAA                                                              | ctrA_qPCR_1           |
| GCAGATGAAGACGTGATGA                                                               | ctrA_qPCR_5           |
| GTTACGAGACCCTGCAGACC                                                              | divK_qPCR_1           |
| TCGTCTTCCTTCAGCCACTT                                                              | divK_qPCR_2           |
| GGATCTGGATCTGGAAGTCG                                                              | pdeA_qPCR_3           |
| AAGCCTTGCCATAGTCACA                                                               | pdeA_qPCR_5           |
| ATCACCGGCATCGATCACTC                                                              | podJ_qPCR_1           |
| CTGCTCGGTCTTCAGTTCGT                                                              | podJ_qPCR_2           |

**Supplementary Table S3, related to STAR Methods, plasmid construction:  
Plasmids used in this study**

| <b>Plasmids</b> |                                                             |            |
|-----------------|-------------------------------------------------------------|------------|
| ML3401          | <i>pYFPC-2-chpT-sfgfp</i>                                   | This study |
| ML3402          | <i>pRVMCS-5-ctrA<math>\Delta</math>3<math>\Omega</math></i> | This study |
| ML3403          | <i>pQF-podJ</i>                                             | This study |
| ML3405          | <i>pRVMCS-5-ctrA</i>                                        | This study |
| ML3406          | <i>pBXMCS-2-dnaA(R357A)</i>                                 | This study |
| ML3407          | <i>pRVMCS-6-parA</i>                                        | This study |
| ML3408          | <i>pRVMCS-6-parA(K20R)</i>                                  | This study |
| ML3409          | <i>pRVMCS-6-parA(K20R)-cfp</i>                              | This study |
| ML3410          | <i>pBXMCS-2-popZ</i>                                        | This study |
| ML3411          | <i>pBXMCS-4-popZ</i>                                        | This study |
| ML3412          | <i>pXGFPC-2-chpT-sfgfp</i>                                  | This study |
| ML3413          | <i>pXGFPC-2-chpT(R167E)(R169E)(R171E)-sfgfp</i>             | This study |
